# Supplementary material for: WS2 monolayer-based light-emitting devices in a vertical p–n architecture
Source: Royal Society of Chemistry journal article supplement (doi:10.1039/c9nr01573f), 2019-01-01
Supplement: c9nr01573f1.pdf [file c9nr01573f1.pdf]

## WS<sub>2</sub> Monolayer Based Light Emitting Devices in a Vertical p-i-n Architecture

*Dominik Andrzejewski, Eric Hopmann, Michèle John, Tilmar Kümmell, Gerd Bacher*

### Supporting Information

#### 1. Photoluminescence dependence on adjacent layers

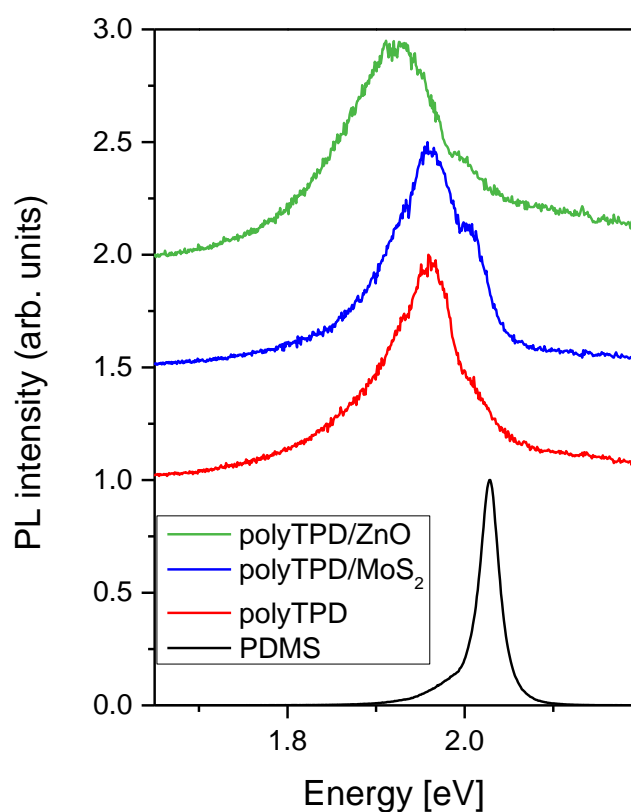

*Figure S1. Change of PL emission during the process chain, showing the influence of the adjacent layers. Black: WS<sub>2</sub> on PDMS, Red: WS<sub>2</sub> on poly-TPD, Blue: WS<sub>2</sub> between poly-TPD and MoS<sub>2</sub> multilayer, Green: WS<sub>2</sub> between poly-TPD and ZnO-NP layer.*

*The spectra are normalized and vertically shifted for clarity.*

The PL analysis of the active WS<sub>2</sub> monolayer at different stages of the process chain indicates the influence of the different surrounding on the luminescence spectrum. The exfoliated flake on PDMS (black) exhibits luminescence dominated by the A exciton with a maximum at 2.015 eV. In contrast, after WS<sub>2</sub> transfer onto TPD (red) we see two lines with maxima at 2 eV and 1.95 eV

that we attribute to the A-exciton, slightly shifted in energy possibly by the different dielectric surrounding, and the negatively charged  $X^-$ , which is shifted by another 50 meV towards lower energy. While the MoS<sub>2</sub>-ESL on top of the WS<sub>2</sub> layer (blue) does not change the PL significantly with respect to the PL on poly-TPD, the PL in the sample with ZnO as ESL is clearly different: The PL maximum is here at 1.91 eV and the emission is significantly broadened to 130 meV. Possible reasons could be bound excitons that are enhanced by the ZnO/WS<sub>2</sub> interface, an enhanced contribution of trions, an energy shift due to the Quantum Confined Stark effect or a combination thereof.

## 2. Dependence of the EL signal on the MoS<sub>2</sub> thickness in the type II design.

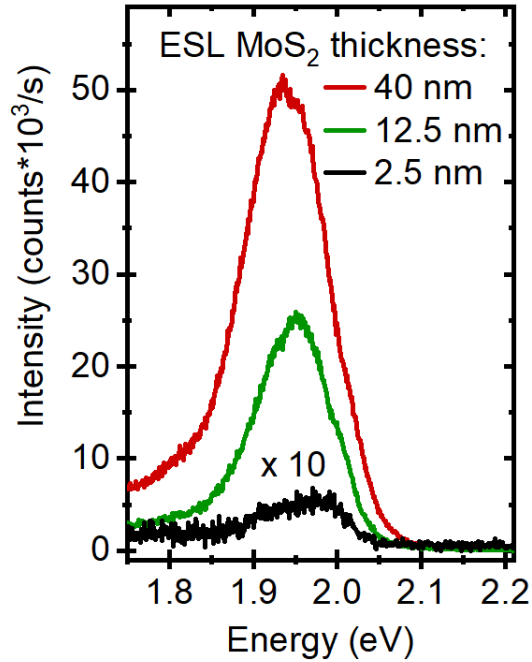

*Figure S2. Electroluminescence spectra of WS<sub>2</sub> p-i-n devices with MoS<sub>2</sub> ESL layers of different thickness at 5.5 V. The intensity increases with increasing number of MoS<sub>2</sub> layers with a simultaneous peak shift to lower energies.*

We studied the influence of the MoS<sub>2</sub>-based electron supporting layer thickness on the electroluminescence of type II devices. As a striking result, only very weak EL is found for thin (2.5 nm) MoS<sub>2</sub>-ESL. Obviously, the influence of the contacts is leading to a hole transfer to the contact and thus to an EL quenching [Ref. S1]. With increasing thickness, the electroluminescence becomes stronger, but with a distinct redshift. Here, we assume hole

transfer from WS<sub>2</sub> to the adjacent layers (poly-TPD and MoS<sub>2</sub>), enhancing the probability for negatively charged excitons (trions) in the WS<sub>2</sub>.

### 3. Estimation of internal quantum efficiency of the WS<sub>2</sub> monolayers

The collection efficiency of our setup was estimated by introducing a reflecting substrate (gold layer with reflectance of 80 % at a wavelength of 532 nm) and measuring the detected counts in the setup for a defined laser power.

The detected photon number per time can be written generally as

$$P_{det}/h\nu_{det} = (P_{exc}/h\nu_{exc}) \cdot IQE \cdot A \cdot \beta$$

Here  $P_{det}/h\nu_{det}$  and  $P_{exc}/h\nu_{exc}$  represent the photons per time detected in the setup and exciting the sample, respectively, with  $P_{det}$  ( $P_{exc}$ ) as detected (exciting) power.  $A$  is the absorbance of the sample at the excitation wavelength,  $IQE$  the internal quantum efficiency in the sample and  $\beta$  the collection efficiency of the setup. In case of the reference with 80% reflection,  $IQE \cdot A$  is set to 0.8 and  $\beta$  can be determined from measuring the counts in the detector and the power of the exciting laser at the position of the sample. From this, we determine a collection efficiency  $\beta = 10^{-3}$ . When characterizing the WS<sub>2</sub> monolayers by PL, the  $IQE$  can be calculated from the laser power, the detected intensity and the absorption in the monolayer that we assume to be 2% at the excitation wavelength of  $\lambda=532$  nm [Ref. S2].

### References

- S1 U. Bhanu, M. R. Islam, L. Tetard and S. I. Khondaker, Scientific Reports **4**, 5575 (2014).
- S2 H. Hill, A. Rigosi, C. Roquelet, A. Chernikov, T. Berkelbach, D. Reichman, M. Hybertsen, L. Brus and T. Heinz, Nano letters **15**, 2992 (2015)
